# Supplementary material for: Longitudinal Changes in Lens Thickness and Lens Power Among Persistent Non-Myopic and Myopic Children
Source: PubMed Central journal article supplement — Invest Ophthalmol Vis Sci. 2022 Sep 15;63(10):10. doi: 10.1167/iovs.63.10.10 (PMC9483235; doi:10.1167/iovs.63.10.10), 2022-09-15
Supplement: iovs-63-10-10_s001.pdf [file iovs-63-10-10_s001.pdf]

**Supplement Table 1. Mean annual change in lens thickness, lens power and axial length during follow-up among students at G7**

|         | 1 <sup>st</sup> quartile<br>(SE change < -0.563D) |                | 2 <sup>nd</sup> quartile<br>(SE change ≥ -0.500D<br>to<br>SE change < -0.325D) |                | 3 <sup>rd</sup> quartile<br>(SE change ≥ -0.313D<br>to<br>SE change < -0.188D) |                | 4 <sup>th</sup> quartile<br>(SE change ≥ -0.125D) |                | <i>P</i> for<br>trend* |
|---------|---------------------------------------------------|----------------|--------------------------------------------------------------------------------|----------------|--------------------------------------------------------------------------------|----------------|---------------------------------------------------|----------------|------------------------|
|         | n                                                 | Mean (SD)      | n                                                                              | Mean (SD)      | n                                                                              | Mean (SD)      | n                                                 | Mean (SD)      |                        |
|         | G7                                                | 208            |                                                                                | 184            |                                                                                | 204            |                                                   | 240            |                        |
| SE (D)  | 208                                               | -0.762 (0.214) | 184                                                                            | -0.433 (0.052) | 204                                                                            | -0.247 (0.047) | 240                                               | 0.004 (0.146)  | <0.001                 |
| LT (mm) | 207                                               | 0.007 (0.018)  | 183                                                                            | 0.012 (0.019)  | 203                                                                            | 0.016 (0.016)  | 236                                               | 0.014 (0.016)  | <0.001                 |
| LP (D)  | 207                                               | -0.228 (0.254) | 181                                                                            | -0.198 (0.248) | 204                                                                            | -0.200 (0.212) | 235                                               | -0.299 (0.369) | 0.009                  |
| AL (mm) | 208                                               | 0.338 (0.101)  | 184                                                                            | 0.209 (0.066)  | 204                                                                            | 0.142 (0.058)  | 240                                               | 0.079 (0.067)  | <0.001                 |

G7: first year of junior high school; SE: spherical equivalence; AL: axial length; LT: lens thickness; LP: lens power; SD: standard deviation.

\**P* for trend was calculated by linear regression model.

**Supplement Table 2. Annual change (2018-2019) in lens thickness, lens power and axial length during follow-up**

|         | Persistent non-myopia |                | Persistent Myopia |                | Newly developed myopia |                | <i>P</i> for trend* |
|---------|-----------------------|----------------|-------------------|----------------|------------------------|----------------|---------------------|
|         | n                     | Mean (SD)      | n                 | Mean (SD)      | n                      | Mean (SD)      |                     |
| G0      | 1126                  |                | 1                 |                | 2                      |                |                     |
| LT (mm) | 227                   | -0.049 (0.038) | 1                 | -0.071 (/)     | 1                      | -0.065 (/)     | /                   |
| LP (D)  | 221                   | -0.947 (0.602) | 1                 | -2.097 (/)     | 1                      | -0.755 (/)     | /                   |
| AL (mm) | 231                   | 0.198 (0.084)  | 1                 | 0.470 (/)      | 1                      | 0.199 (/)      | /                   |
| G1      | 1239                  |                | 10                |                | 75                     |                |                     |
| LT (mm) | 983                   | -0.033 (0.035) | 7                 | -0.036 (0.036) | 65                     | -0.045 (0.028) | 0.025               |
| LP (D)  | 920                   | -0.433 (0.470) | 7                 | -0.681 (0.354) | 64                     | -0.636 (0.488) | <0.001              |
| AL (mm) | 990                   | 0.152 (0.069)  | 7                 | 0.408 (0.298)  | 64                     | 0.323 (0.177)  | <0.001              |
| G4      | 1107                  |                | 248               |                | 499                    |                |                     |
| LT (mm) | 822                   | -0.028 (0.037) | 225               | -0.026 (0.028) | 404                    | -0.040 (0.038) | <0.001              |
| LP (D)  | 795                   | -0.423 (0.437) | 219               | -0.515 (0.401) | 470                    | -0.674 (0.412) | <0.001              |
| AL (mm) | 818                   | 0.194 (0.090)  | 221               | 0.470 (0.172)  | 472                    | 0.434 (0.171)  | <0.001              |
| G7      | 325                   |                | 421               |                | 121                    |                |                     |
| LT (mm) | 229                   | 0.012 (0.022)  | 399               | 0.013 (0.022)  | 105                    | -0.002 (0.027) | <0.001              |
| LP (D)  | 228                   | -0.146 (0.355) | 394               | -0.171 (0.365) | 103                    | -0.355 (0.364) | <0.001              |
| AL (mm) | 303                   | 0.117 (0.085)  | 405               | 0.263 (0.138)  | 106                    | 0.337 (0.161)  | <0.001              |

G0: kindergarten; G1: first year of primary school; G4: fourth year of primary school; G7: first year of junior high school; AL: axial length; LT: lens thickness; LP: lens power; D: diopters; SD: standard deviation.

\* *P* for trend was calculated by linear regression model.

**Supplement Table 3. Annual change (2019-2020) in lens thickness, lens power and axial length during follow-up**

|         | Persistent non-myopia |                | Persistent Myopia |                | Newly developed myopia |                | <i>P</i> for trend* |
|---------|-----------------------|----------------|-------------------|----------------|------------------------|----------------|---------------------|
|         | n                     | Mean (SD)      | n                 | Mean (SD)      | n                      | Mean (SD)      |                     |
| G0      | 1126                  |                | 1                 |                | 2                      |                |                     |
| LT (mm) | 877                   | -0.045 (0.044) | 1                 | -0.049 (/)     | 2                      | -0.076 (0.027) | /                   |
| LP (D)  | 843                   | -0.844 (0.590) | 1                 | -0.366 (/)     | 2                      | -1.036 (0.565) | /                   |
| AL (mm) | 913                   | 0.175 (0.103)  | 1                 | 0.560 (/)      | 2                      | 0.752 (0.014)  | /                   |
| G1      | 1239                  |                | 10                |                | 75                     |                |                     |
| LT (mm) | 1053                  | -0.022 (0.034) | 9                 | -0.017 (0.028) | 61                     | -0.029 (0.044) | <0.001              |
| LP (D)  | 970                   | -0.566 (0.479) | 8                 | -0.437 (0.359) | 58                     | -0.566 (1.062) | <0.001              |
| AL (mm) | 1057                  | 0.174 (0.114)  | 9                 | 0.330 (0.177)  | 59                     | 0.497 (0.218)  | <0.001              |
| G4      | 1107                  |                | 248               |                | 499                    |                |                     |
| LT (mm) | 873                   | 0.013 (0.040)  | 218               | -0.008 (0.030) | 357                    | 0.003 (0.028)  | <0.001              |
| LP (D)  | 853                   | -0.296 (0.542) | 215               | -0.286 (0.437) | 470                    | -0.384 (0.542) | 0.015               |
| AL (mm) | 883                   | 0.153 (0.152)  | 219               | 0.327 (0.208)  | 472                    | 0.401 (0.170)  | <0.001              |
| G7      | 325                   |                | 421               |                | 121                    |                |                     |
| LT (mm) | 243                   | 0.013 (0.024)  | 383               | 0.017 (0.020)  | 92                     | 0.006 (0.022)  | 0.282               |
| LP (D)  | 240                   | -0.365 (0.497) | 374               | -0.286 (0.437) | 88                     | -0.252 (0.374) | <0.001              |
| AL (mm) | 257                   | 0.097 (0.093)  | 387               | 0.165 (0.108)  | 93                     | 0.237 (0.121)  | <0.001              |

G0: kindergarten; G1: first year of primary school; G4: fourth year of primary school; G7: first year of junior high school; AL: axial length; LT: lens thickness; LP: lens power; D: diopters; SD: standard deviation.

\* *P* for trend was calculated by linear regression model.

**Supplement Table 4. Annual changes in lens thickness for different age groups.**

|                       | 3-year-old   | 4-year-old   | 6-year-old   | 7-year-old   | 9-year-old   | 10-year-old  | 12-year-old | 13-year-old | P value* |
|-----------------------|--------------|--------------|--------------|--------------|--------------|--------------|-------------|-------------|----------|
| Baseline              |              |              |              |              |              |              |             |             |          |
| LT, mm                | 3.61 (0.13)  | 3.59 (0.13)  | 3.47 (0.14)  | 3.44 (0.14)  | 3.39 (0.15)  | 3.38 (0.15)  | 3.34 (0.15) | 3.35 (0.17) | <0.001   |
| First-year follow-up  |              |              |              |              |              |              |             |             |          |
| LT, mm                | 3.56 (0.13)  | 3.54 (0.13)  | 3.43 (0.14)  | 3.40 (0.15)  | 3.35 (0.15)  | 3.36 (0.15)  | 3.36 (0.16) | 3.36 (0.17) | <0.001   |
| $\Delta$ LT, mm       | -0.04 (0.04) | -0.05 (0.04) | -0.04 (0.04) | -0.03 (0.03) | -0.04 (0.04) | -0.03 (0.04) | 0.01 (0.02) | 0.01 (0.02) | <0.001   |
| Second-year follow-up |              |              |              |              |              |              |             |             |          |
| LT, mm                | 3.51 (0.14)  | 3.50 (0.13)  | 3.40 (0.14)  | 3.38 (0.15)  | 3.36 (0.15)  | 3.37 (0.16)  | 3.37 (0.16) | 3.37 (0.18) | <0.001   |
| $\Delta$ LT, mm       | -0.05 (0.04) | -0.05 (0.04) | -0.03 (0.04) | -0.02 (0.03) | 0.01 (0.04)  | 0.01 (0.03)  | 0.01 (0.02) | 0.01 (0.02) | <0.001   |

LT: lens thickness. Data was presented as mean (standard deviation).  $\Delta$  was calculated as current observations minus previous year's observations.

\* The trend across age groups was testing by linear regression for LT and  $\Delta$ .

† Annual changes ( $\Delta$ s) by age groups were tested using paired t-test, and all P-values were <0.001.

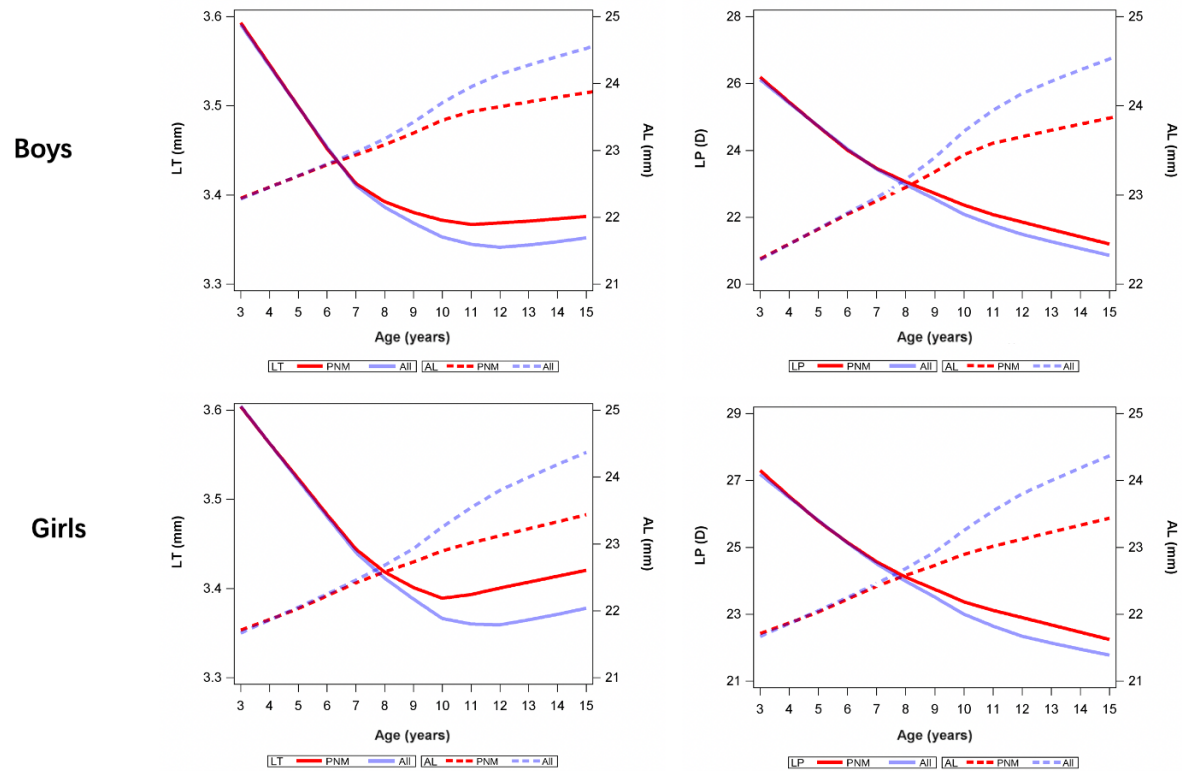

**Supplement Figure 1. Gender-specific change in lens thickness and axial length with increasing age among persistent myopia and non-myopia children during the follow-up.** The curves were estimated using loess plots with a smoothing value of 0.50. AL: axial length; LT: lens thickness; LP: lens power; PM: persistent myopia; PNM: persistent non-myopia; D: diopters.

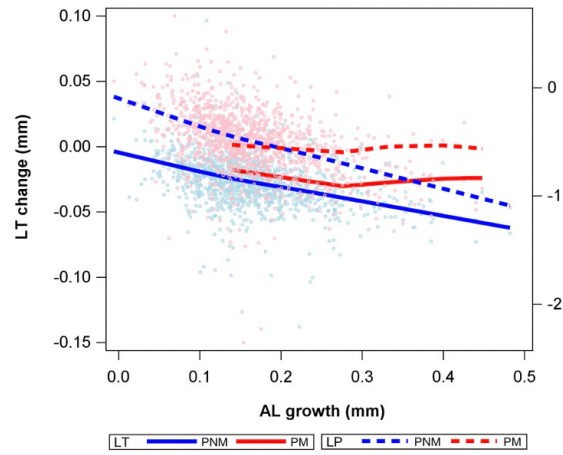

**G1**

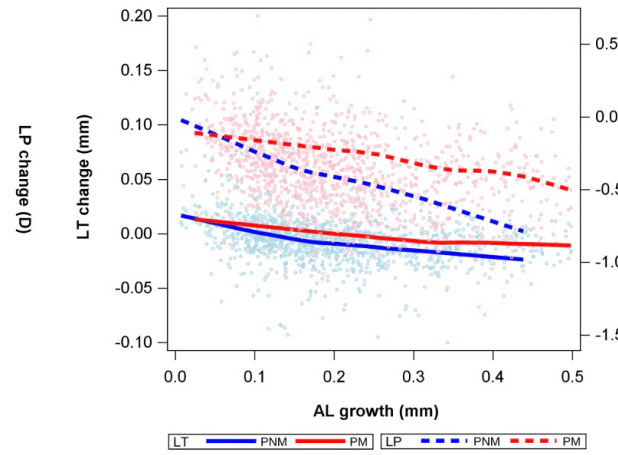

**G4**

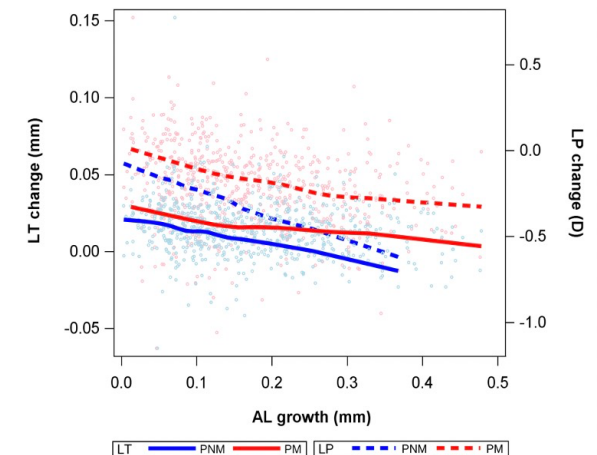

**G7**

**Supplement Figure 2. Change in lens thickness, lens power with axial length growth among persistent myopia and non-myopia children during the follow-up.** The curves were estimated using lowess plots with a smoothing value of 0.50. AL: axial length; LT: lens thickness; LP: lens power; PM: persistent myopia; PNM: persistent non-myopia; D: diopters; G1: first year of primary school; G4: fourth year of primary school; G7: first year of junior high school. Detailed regression coefficient and p value could be found in Table 3. Specifically for each of sub-samples, the regression co-efficient ( $\beta$ ) was estimated by a separate model with LT growth and LP change as the dependent variable, and AL growth, refractive status (PM vs. PNM) as the independent variables and an interaction term included, adjusting for sex and height as covariates.

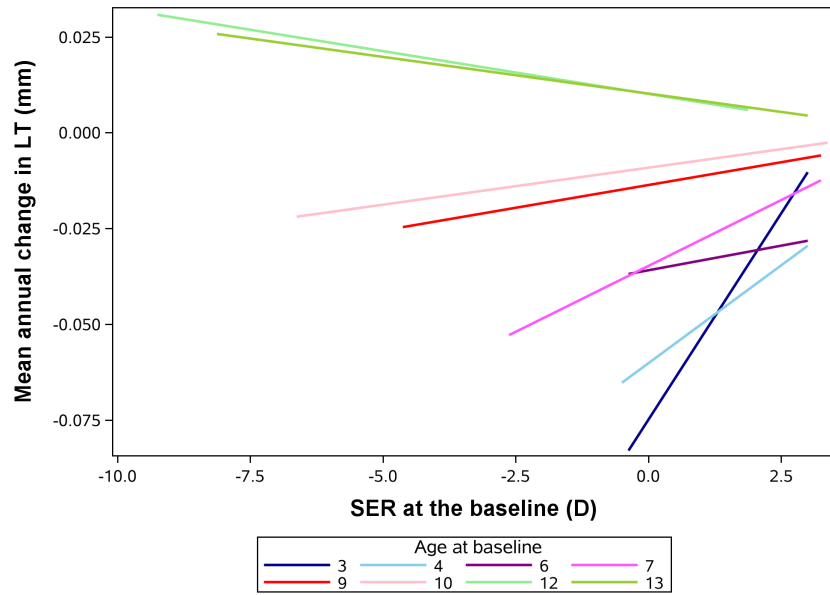

**Supplement Figure 3. Change in lens thickness for children with different age and spherical equivalence at baseline.** LT: lens thickness; SER: spherical equivalence. Regression with LT change as the dependent variable and baseline SER as the independent variable showed an overall P value of less than 0.001.

### Supplement File. The Bennett formula

The lens power ( $P_L$ ) was calculated using Bennett method:

$$P_{L, \text{Bennett}} = \frac{-1000n (S_{cv}+K)}{1000n - (ACD + c_1LT)(S_{cv}+K)} + \frac{1000n}{c_2LT + V}$$

$$S_{cv} = \frac{SE}{(1 - 0.014SE)}, \text{ spherical refraction at the corneal vertex;}$$

$SE$  = spherical power +  $0.5$  \* cylindrical power

$n = 4/3$ , Refractive index of aqueous and vitreous humors;

$c_1LT$ : the distance between the anterior lens surface and first lenticular principal plane

$c_2LT$ : the distance between the posterior lens surface and second lenticular principal plane

$c_1$  and  $c_2$  constants using the Gullstrand-Emsley eye model:  $c_1 = 0.596$ ,  $c_2 = -0.358$ ;

$V = AL - ACD - LT$ , Vitreous depth

$SE$ : Spherical equivalent,  $AL$ : Axial length,  $ACD$ : Anterior chamber depth (corneal epithelium to anterior lens),  $LT$ : Lens thickness,  $K$ : Corneal power
